# Supplementary material
Source: Springer Nature journal article supplement (https://www.springermedizin.de/resource/supplementary/12885_2011_2711_MOESM8_ESM.pdf/9461760)

Node(15.21) 2003 DTP GI50 Set; Tanimoto Linkage (single): 0.40+/-0.28

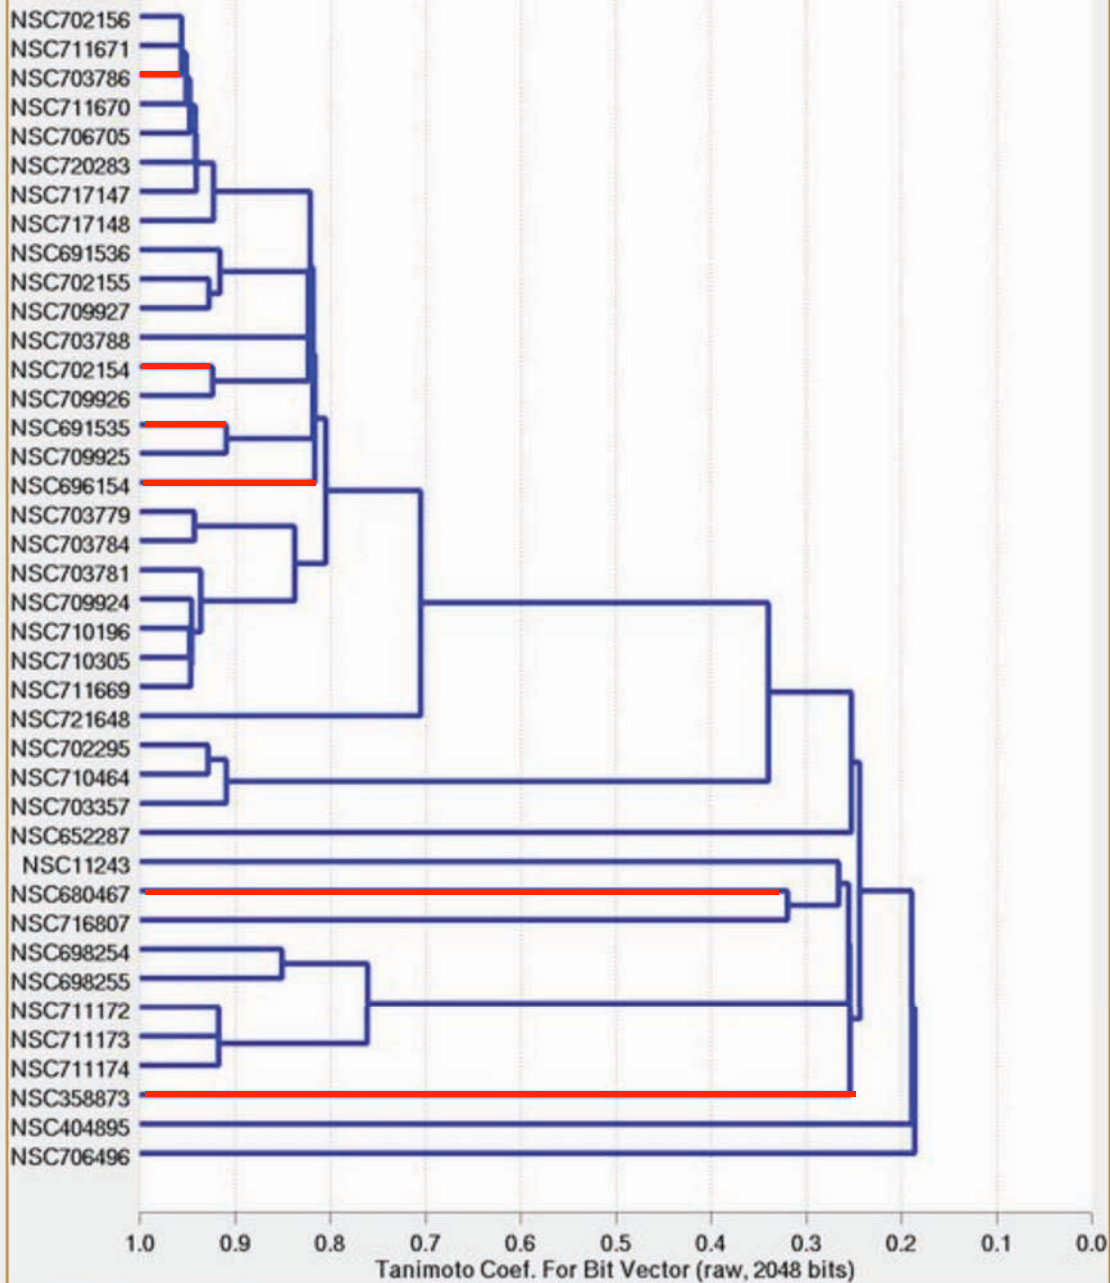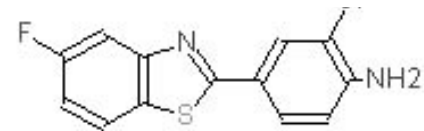

**NSC 703786**

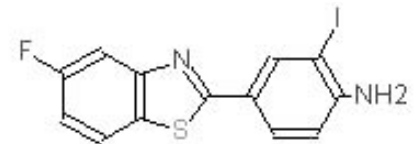

**NSC 702154**

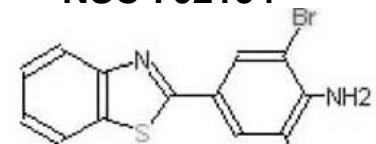

**NSC 691535**

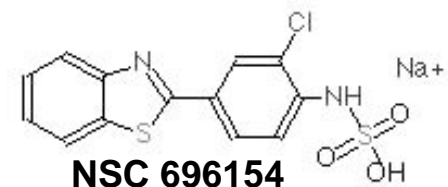

**NSC 696154**

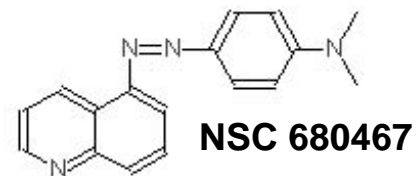

**NSC 680467**

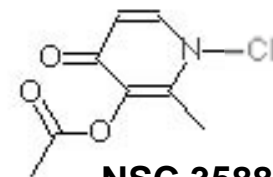

**NSC 358873**

Supplement: MOESM8 [file 9461760]
